# Supplementary material
Source: PubMed Central journal article supplement (PMC8349568)
Supplement: NIHMS1692736-supplement-4.pdf [file NIHMS1692736-supplement-4.pdf]

**Table S1** The specified dose constraints for OARs of head and neck cancer

| OAR               | Constraints in 30-33 fractions |
|-------------------|--------------------------------|
| Brain             | Max dose <60 Gy                |
| Brainstem         | Max dose <54 Gy                |
| Spinal cord       | Max dose <45 Gy                |
| Optical apparatus | Max dose <54 Gy                |
| Cornea            | Max dose <35 Gy                |
| Cochleas          | Max dose <35 Gy                |
| Salivary glands   | Mean dose <26 Gy               |
| Oral cavity       | Mean dose <30 Gy               |
| Larynx            | Mean dose <35 Gy               |

**Abbreviations:** OAR, Organ at risk
